# Supplementary material
Source: PubMed Central journal article supplement (PMC3883820)
Supplement: supp_130550_effect-reid-1-at.pdf [file supp_130550_effect-reid-1-at.pdf]

Appendix 1a (as supplied by authors): Between and within group comparisons for spouses in the family heart health intervention group (n=67) and the control group (n=65)

| Outcome measure and treatment condition | Baseline     | 3-Month Follow-up | 12-Month Follow-up | Mixed Linear Models Comparisons |         |      |     |              |     |
|-----------------------------------------|--------------|-------------------|--------------------|---------------------------------|---------|------|-----|--------------|-----|
|                                         |              |                   |                    | Group                           |         | Time |     | Group X Time |     |
|                                         | Mean (SD)    | Mean (SD)         | Mean (SD)          | F                               | P       | F    | P   | F            | P   |
| <b>Primary Outcomes</b>                 |              |                   |                    |                                 |         |      |     |              |     |
| TC: HDL-C Ratio                         |              |                   |                    |                                 |         |      |     |              |     |
| FHH group                               | 3.73 (0.94)  | 3.78 (0.91)       | 3.70 (1.05)        | 0.9                             | 0.3     | 0.1  | 0.7 | 0.0          | 0.8 |
| Control group                           | 3.86 (0.86)  | 3.88 (1.01)       | 3.86(1.03)         |                                 |         |      |     |              |     |
| Physical activity, minutes/week         |              |                   |                    |                                 |         |      |     |              |     |
| FHH group                               | 92.6 (100.1) | 182.2 (123.4)     | 176.3 (130.5)      | 42.0                            | <0.0001 | 0.0  | 0.9 | 0.3          | 0.6 |
| Control group                           | 76.5 (109.8) | 71.5 (100.2)      | 81.6 (94.4)        |                                 |         |      |     |              |     |
| Fruits and vegetables, servings/day     |              |                   |                    |                                 |         |      |     |              |     |
| FHH group                               | 62 (2.9)     | 8.1 (3.2)         | 7.2 (3.0)          | 4.2                             | 0.04    | 0.4  | 0.5 | 1.6          | 0.2 |
| Control group                           | 6.8 (3.0)    | 6.6 (3.1)         | 6.8 (2.6)          |                                 |         |      |     |              |     |
| <b>Secondary Outcomes</b>               |              |                   |                    |                                 |         |      |     |              |     |
| TC, mmol/L                              |              |                   |                    |                                 |         |      |     |              |     |
| FHH group                               | 5.01 (0.86)  | 4.78 (0.81)       | 4.85 (0.86)        | 6.9                             | 0.009   | 0.0  | 0.9 | 0.3          | 0.6 |
| Control group                           | 4.98 (0.90)  | 5.15 (1.10)       | 5.10 (0.88)        |                                 |         |      |     |              |     |
| HDL-C, mmol/L                           |              |                   |                    |                                 |         |      |     |              |     |
| FHH group                               | 1.41 (0.43)  | 1.34 (0.40)       | 1.40 (0.43)        | 0.1                             | 0.8     | 0.1  | 0.8 | 0.9          | 0.3 |
| Control group                           | 1.35 (0.37)  | 1.40 (0.38)       | 1.36 (0.31)        |                                 |         |      |     |              |     |
| LDL-C, mmol/L                           |              |                   |                    |                                 |         |      |     |              |     |

|                                                                                                                                                                                                                                       |              |              |              |      |       |     |      |     |      |
|---------------------------------------------------------------------------------------------------------------------------------------------------------------------------------------------------------------------------------------|--------------|--------------|--------------|------|-------|-----|------|-----|------|
| FHH group                                                                                                                                                                                                                             | 3.06 (0.71)  | 2.89 (0.82)  | 2.85 (0.82)  | 10.1 | 0.002 | 0.1 | .08  | 0.0 | 0.99 |
| Control group                                                                                                                                                                                                                         | 3.14 (0.74)  | 3.22 (0.90)  | 3.19 (0.92)  |      |       |     |      |     |      |
| Triglycerides, mmol/L                                                                                                                                                                                                                 |              |              |              |      |       |     |      |     |      |
| FHH group                                                                                                                                                                                                                             | 1.18 (0.59)  | 1.21 (0.55)  | 1.32 (0.80)  | 1.2  | 0.3   | 0.9 | 0.4  | 0.2 | 0.7  |
| Control group                                                                                                                                                                                                                         | 1.09 (0.43)  | 1.16 (0.40)  | 1.20 (0.54)  |      |       |     |      |     |      |
| Glucose, mmol/L                                                                                                                                                                                                                       |              |              |              |      |       |     |      |     |      |
| FHH group                                                                                                                                                                                                                             | 5.16 (0.60)  | 5.16 (0.53)  | 5.17 (0.64)  | 4.4  | 0.04  | 0.2 | 0.7  | 0.3 | 0.6  |
| Control group                                                                                                                                                                                                                         | 4.93 (0.56)  | 5.04 (0.49)  | 4.97 (0.52)  |      |       |     |      |     |      |
| SBP, mmHg                                                                                                                                                                                                                             |              |              |              |      |       |     |      |     |      |
| FHH group                                                                                                                                                                                                                             | 125.1 (15.9) | 116.4 (14.4) | 118.7 (15.1) | 0.8  | 0.4   | 1.0 | 0.3  | 0.1 | 0.8  |
| Control group                                                                                                                                                                                                                         | 118.1 (17.1) | 118.5 (14.9) | 119.8 (17.7) |      |       |     |      |     |      |
| DBP, mmHg                                                                                                                                                                                                                             |              |              |              |      |       |     |      |     |      |
| FHH group                                                                                                                                                                                                                             | 75.9 (8.9)   | 72.8 (7.5)   | 74.0 (8.7)   | 0.3  | 0.6   | 0.2 | 0.6  | 0.4 | 0.5  |
| Control group                                                                                                                                                                                                                         | 74.2 (9.5)   | 74.2 (9.0)   | 74.0 (9.9)   |      |       |     |      |     |      |
| Body mass index, kg/m <sup>2</sup>                                                                                                                                                                                                    |              |              |              |      |       |     |      |     |      |
| FHH group                                                                                                                                                                                                                             | 28.3 (5.2)   | 27.8 (5.0)   | 27.8 (4.7)   | 5.6  | 0.02  | 0.0 | 0.96 | 0.0 | 0.99 |
| Control group                                                                                                                                                                                                                         | 29.6 (6.3)   | 28.4 (5.8)   | 28.4 (5.0)   |      |       |     |      |     |      |
| Waist circ., cm                                                                                                                                                                                                                       |              |              |              |      |       |     |      |     |      |
| FHH group                                                                                                                                                                                                                             | 93.1 (13.1)  | 92.7 (15.0)  | 91.0 (12.4)  | 1.4  | 0.2   | 0.1 | 0.8  | 1.1 | 0.31 |
| Control group                                                                                                                                                                                                                         | 95.2 (14.6)  | 92.9 (14.6)  | 93.9 (13.6)  |      |       |     |      |     |      |
| FHH = Family heart health intervention group; TC = total serum cholesterol; HDL-C = high-density lipoprotein cholesterol; LDL-C = low-density lipoprotein cholesterol; SBP = systolic blood pressure; DBP = diastolic blood pressure. |              |              |              |      |       |     |      |     |      |

Appendix 1b (as supplied by authors): : Between and within group comparisons for offspring in the family heart health intervention group (n=98) and the control group (n=101)

| Outcome measure and treatment condition | Baseline     | 3-Month Follow-up | 12-Month Follow-up | Mixed Linear Models Comparisons |      |      |     |              |      |
|-----------------------------------------|--------------|-------------------|--------------------|---------------------------------|------|------|-----|--------------|------|
|                                         |              |                   |                    | Group                           |      | Time |     | Group X Time |      |
|                                         | Mean (SD)    | Mean (SD)         | Mean (SD)          | F                               | P    | F    | P   | F            | P    |
| <b>Primary Outcomes</b>                 |              |                   |                    |                                 |      |      |     |              |      |
| TC: HDL-C Ratio                         |              |                   |                    |                                 |      |      |     |              |      |
| FHH group                               | 4.35 (1.51)  | 4.20 (1.48)       | 4.35 (1.51)        | 1.8                             | 0.2  | 0.1  | 0.8 | 0.6          | 0.5  |
| Control group                           | 4.38 (1.36)  | 4.11 (1.16)       | 4.04 (1.07)        |                                 |      |      |     |              |      |
| Physical activity, minutes/week         |              |                   |                    |                                 |      |      |     |              |      |
| FHH group                               | 82.3 (102.1) | 172.3 (121.7)     | 122.7 (127.0)      | 2.1                             | 0.1  | 2.7  | 0.1 | 2.7          | 0.1  |
| Control group                           | 89.2 (114.0) | 125.3 (135.5)     | 125.4 (132.9)      |                                 |      |      |     |              |      |
| Fruits and vegetables, servings/day     |              |                   |                    |                                 |      |      |     |              |      |
| FHH group                               | 6.4 (3.0)    | 8.0 (3.2)         | 7.3 (3.3)          | 4.7                             | 0.03 | 2.2  | 0.1 | 0.0          | 0.9  |
| Control group                           | 6.3 (3.1)    | 7.0 (3.5)         | 6.4 (3.4)          |                                 |      |      |     |              |      |
| <b>Secondary Outcomes</b>               |              |                   |                    |                                 |      |      |     |              |      |
| TC, mmol/L                              |              |                   |                    |                                 |      |      |     |              |      |
| FHH group                               | 5.17 (1.04)  | 5.15 (1.01)       | 5.08 (1.03)        | 6.3                             | 0.01 | 0.5  | 0.5 | 0.0          | 0.97 |
| Control group                           | 5.22 (1.06)  | 4.87 (0.93)       | 4.79 (1.06)        |                                 |      |      |     |              |      |
| HDL-C, mmol/L                           |              |                   |                    |                                 |      |      |     |              |      |
| FHH group                               | 1.29 (0.37)  | 1.32 (0.40)       | 1.29 (0.40)        | 3.5                             | 0.06 | 0.4  | 0.5 | 0.0          | 0.8  |
| Control group                           | 1.25 (0.30)  | 1.24 (0.29)       | 1.22 (0.27)        |                                 |      |      |     |              |      |
| LDL-C,                                  |              |                   |                    |                                 |      |      |     |              |      |

|                                                                                                                                                                                                                                       |                              |                              |                              |      |       |     |       |     |     |
|---------------------------------------------------------------------------------------------------------------------------------------------------------------------------------------------------------------------------------------|------------------------------|------------------------------|------------------------------|------|-------|-----|-------|-----|-----|
| mmol/L<br>FHH group<br>Control group                                                                                                                                                                                                  | 3.26 (0.94)<br>3.30 (0.96)   | 3.23 (0.88)<br>3.04 (0.88)   | 3.24 (0.79)<br>2.89 (0.97)   | 6.9  | 0.009 | 0.5 | .05   | 0.6 | 0.4 |
| Triglycerides,<br>mmol/L<br>FHH group<br>Control group                                                                                                                                                                                | 1.41 (0.95)<br>1.52 (1.06)   | 1.28 (0.81)<br>1.29 (0.65)   | 1.42 (0.95)<br>1.49 (0.76)   | 0.2  | 0.6   | 3.5 | 0.06  | 0.1 | 0.8 |
| Glucose,<br>mmol/L<br>FHH group<br>Control group                                                                                                                                                                                      | 5.05 (0.47)<br>5.10 (0.59)   | 5.05 (0.47)<br>5.20 (0.55)   | 5.11 (0.63)<br>5.16 (0.57)   | 2.6  | 0.1   | 0.0 | 0.9   | 0.6 | 0.4 |
| SBP, mmHg<br>FHH group<br>Control group                                                                                                                                                                                               | 117.9 (14.4)<br>118.4 (15.8) | 113.8 (14.2)<br>111.6 (10.4) | 115.8 (14.6)<br>115.0 (10.3) | 1.2  | 0.3   | 3.9 | 0.048 | 0.2 | 0.6 |
| DBP, mmHg<br>FHH group<br>Control group                                                                                                                                                                                               | 76.6 (9.7)<br>76.6 (10.1)    | 73.8 (9.3)<br>72.9 (7.2)     | 75.2 (10.1)<br>75.1 (7.1)    | 0.2  | 0.6   | 3.5 | 0.06  | 0.2 | 0.6 |
| Body mass<br>index, kg/m <sup>2</sup><br>FHH group<br>Control group                                                                                                                                                                   | 29.9 (5.9)<br>29.5 (5.4)     | 28.6 (4.9)<br>29.3 (5.6)     | 28.5 (5.2)<br>29.6 (4.7)     | 12.4 | 0.001 | 0.2 | 0.6   | 0.7 | 0.4 |
| Waist circ., cm<br>FHH group<br>Control group                                                                                                                                                                                         | 98.1 (14.3)<br>97.9 (14.5)   | 93.8 (13.1)<br>96.2 (14.2)   | 93.8 (13.9)<br>96.8 (12.9)   | 7.7  | 0.006 | 0.1 | 0.7   | 0.1 | 0.7 |
| FHH = Family heart health intervention group; TC = total serum cholesterol; HDL-C = high-density lipoprotein cholesterol; LDL-C = low-density lipoprotein cholesterol; SBP = systolic blood pressure; DBP = diastolic blood pressure. |                              |                              |                              |      |       |     |       |     |     |

Appendix 1c (as supplied by authors): : Between and within group comparisons for siblings in the family heart health intervention group (n=46) and the control group (n=49)

| Outcome measure and treatment condition | Baseline      | 3-Month Follow-up | 12-Month Follow-up | Mixed Linear Models Comparisons |      |      |     |              |      |
|-----------------------------------------|---------------|-------------------|--------------------|---------------------------------|------|------|-----|--------------|------|
|                                         |               |                   |                    | Group                           |      | Time |     | Group X Time |      |
|                                         | Mean (SD)     | Mean (SD)         | Mean (SD)          | F                               | P    | F    | P   | F            | P    |
| <b>Primary Outcomes</b>                 |               |                   |                    |                                 |      |      |     |              |      |
| TC: HDL-C Ratio                         |               |                   |                    |                                 |      |      |     |              |      |
| FHH group                               | 4.18 (1.51)   | 3.92 (1.13)       | 4.08 (1.15)        | 0.0                             | 0.9  | 0.4  | 0.5 | 0.1          | 0.7  |
| Control group                           | 4.34 (1.40)   | 4.00 (1.38)       | 4.06 (1.19)        |                                 |      |      |     |              |      |
| Physical activity, minutes/week         |               |                   |                    |                                 |      |      |     |              |      |
| FHH group                               | 110.5 (151.6) | 179.7 (108.6)     | 135.9 (132.3)      | 1.2                             | 0.3  | 0.4  | 0.5 | 2.4          | 0.1  |
| Control group                           | 103.8 (121.6) | 126.6 (118.3)     | 144.6 (137.2)      |                                 |      |      |     |              |      |
| Fruits and vegetables, servings/day     |               |                   |                    |                                 |      |      |     |              |      |
| FHH group                               | 6.3 (3.3)     | 7.9 (3.8)         | 7.9 (4.1)          | 5.1                             | 0.03 | 0.0  | 0.9 | 0.0          | 0.99 |
| Control group                           | 6.7 (2.7)     | 6.6 (2.8)         | 6.5 (2.8)          |                                 |      |      |     |              |      |
| <b>Secondary Outcomes</b>               |               |                   |                    |                                 |      |      |     |              |      |
| TC, mmol/L                              |               |                   |                    |                                 |      |      |     |              |      |
| FHH group                               | 5.21 (1.01)   | 4.92 (1.01)       | 5.10 (1.04)        | 0.0                             | 0.9  | 0.7  | 0.4 | 0.2          | 0.7  |
| Control group                           | 5.36 (1.07)   | 4.97 (1.06)       | 5.03 (1.06)        |                                 |      |      |     |              |      |
| HDL-C, mmol/L                           |               |                   |                    |                                 |      |      |     |              |      |
| FHH group                               | 1.30 (0.32)   | 1.32 (0.37)       | 1.32 (0.37)        | 0.0                             | 0.9  | 0.1  | 0.8 | 0.1          | 0.8  |
| Control group                           | 1.31 (0.37)   | 1.32 (0.37)       | 1.30 (0.34)        |                                 |      |      |     |              |      |
| LDL-C,                                  |               |                   |                    |                                 |      |      |     |              |      |

|                                                                                                                                                                                                                                       |              |              |              |      |        |     |     |     |      |
|---------------------------------------------------------------------------------------------------------------------------------------------------------------------------------------------------------------------------------------|--------------|--------------|--------------|------|--------|-----|-----|-----|------|
| mmol/L<br>FHH group                                                                                                                                                                                                                   | 3.38 (0.89)  | 3.12 (0.89)  | 3.25 (0.94)  | 0.4  | 0.5    | 0.7 | 0.4 | 0.1 | 0.8  |
| Control group                                                                                                                                                                                                                         | 3.43 (0.98)  | 3.07 (0.89)  | 3.14 (0.94)  |      |        |     |     |     |      |
| Triglycerides,<br>mmol/L<br>FHH group                                                                                                                                                                                                 | 1.16 (0.46)  | 1.07 (0.42)  | 1.20 (0.45)  | 4.5  | 0.04   | 1.3 | 0.3 | 0.4 | 0.6  |
| Control group                                                                                                                                                                                                                         | 1.32 (0.64)  | 1.28 (0.59)  | 1.31 (0.50)  |      |        |     |     |     |      |
| Glucose,<br>mmol/L<br>FHH group                                                                                                                                                                                                       | 5.22 (0.54)  | 5.18 (0.48)  | 5.22 (0.46)  | 0.9  | 0.3    | 0.2 | 0.7 | 0.0 | 0.98 |
| Control group                                                                                                                                                                                                                         | 5.28 (0.58)  | 5.26 (0.56)  | 5.30 (0.59)  |      |        |     |     |     |      |
| SBP, mmHg<br>FHH group                                                                                                                                                                                                                | 125.4 (14.6) | 120.4 (15.6) | 121.9 (12.9) | 0.0  | 0.9    | 0.1 | 0.7 | 0.1 | 0.8  |
| Control group                                                                                                                                                                                                                         | 127.7 (17.3) | 120.5 (19.2) | 120.8 (16.3) |      |        |     |     |     |      |
| DBP, mmHg<br>FHH group                                                                                                                                                                                                                | 78.3 (7.4)   | 74.8 (7.6)   | 77.9 (9.3)   | 0.0  | 0.98   | 0.6 | 0.4 | 1.5 | 0.2  |
| Control group                                                                                                                                                                                                                         | 78.2 (9.9)   | 76.7 (12.9)  | 76.0 (9.5)   |      |        |     |     |     |      |
| Body mass<br>index, kg/m <sup>2</sup><br>FHH group                                                                                                                                                                                    | 28.9 (4.6)   | 28.2 (4.3)   | 28.4 (4.3)   | 13.4 | <0.001 | 0.0 | 0.8 | 1.3 | 0.3  |
| Control group                                                                                                                                                                                                                         | 29.8 (6.6)   | 29.1 (6.7)   | 28.9 (6.6)   |      |        |     |     |     |      |
| Waist circ., cm<br>FHH group                                                                                                                                                                                                          | 97.0 (11.4)  | 94.6 (13.1)  | 94.3 (13.9)  | 1.3  | 0.3    | 0.4 | 0.5 | 0.2 | 0.7  |
| Control group                                                                                                                                                                                                                         | 99.2 (17.0)  | 96.7 (15.7)  | 95.3 (15.7)  |      |        |     |     |     |      |
| FHH = Family heart health intervention group; TC = total serum cholesterol; HDL-C = high-density lipoprotein cholesterol; LDL-C = low-density lipoprotein cholesterol; SBP = systolic blood pressure; DBP = diastolic blood pressure. |              |              |              |      |        |     |     |     |      |
